# Supplementary material for: Strong Tetrel Bonds: Theoretical Aspects and Experimental Evidence
Source: MDPI journal article supplement (doi:10.3390/molecules23102642), 2018-10-15

# “ Supporting Information ”

## Strong Tetrel Bonds: Theoretical Aspects and Experimental Evidence

Mehdi D. Eshrafi \* and Parisasadat Mousavian

Laboratory of Theoretical Chemistry, Department of Chemistry, University of Maragheh, Maragheh, 5513864596,  
Iran; p.mosavian1327@gmail.com

\* Correspondence: esrafi@maragheh.ac.ir; Tel.: +98-42-12237955; Fax: +98-4212276060

**Figure S1.** Optimized structure of the anionic tetrel-bonded complexes

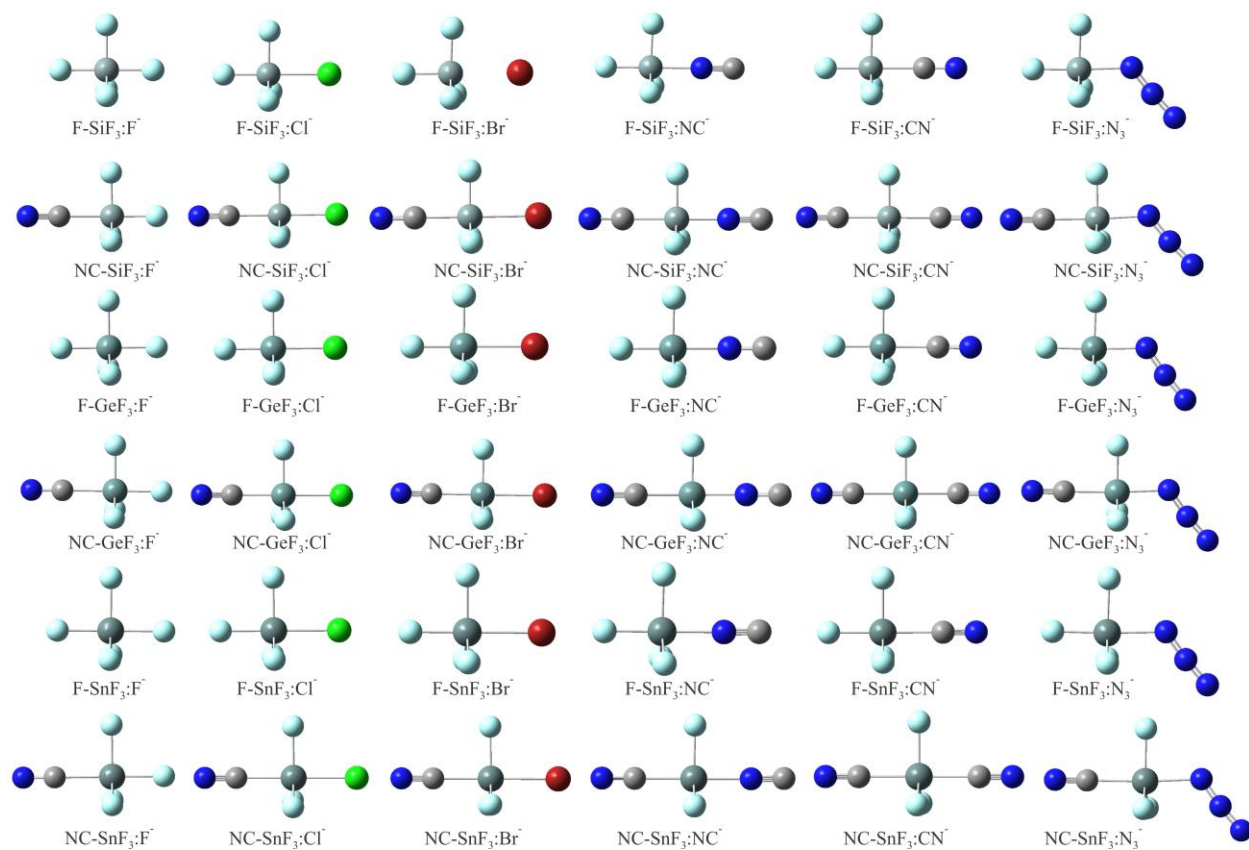

**Figure S2.** Optimized structure of the cationic tetrel-bonded complexes 7-30

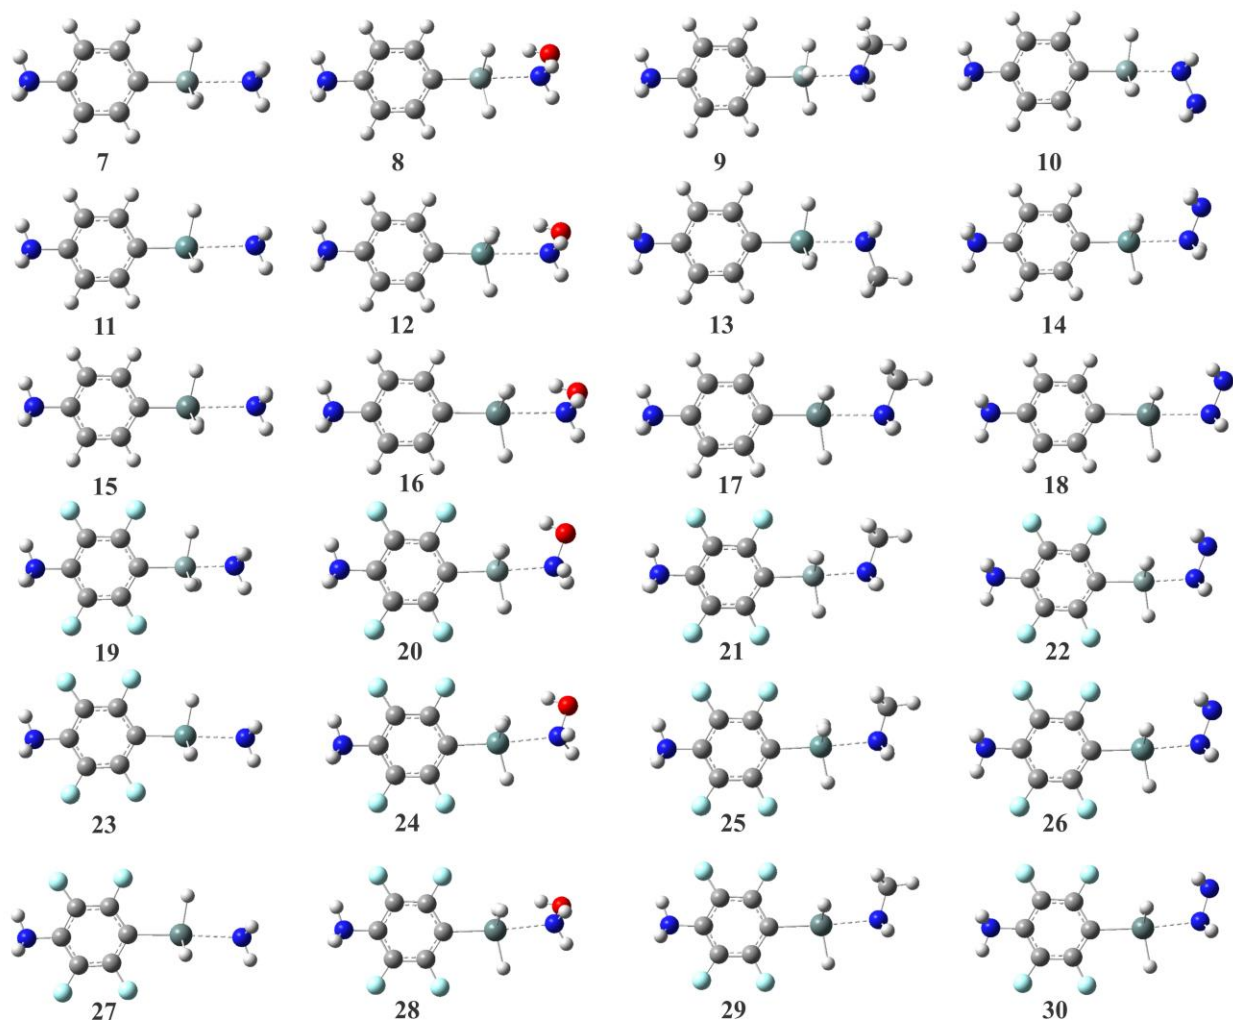

**Figure S3.** Correlation between the stabilization energy, due to the LP(N)  $\rightarrow$  BD\*<sub>M-C</sub> orbital interaction, and interaction energies of cationic tetrel-bonded complexes **7-30**

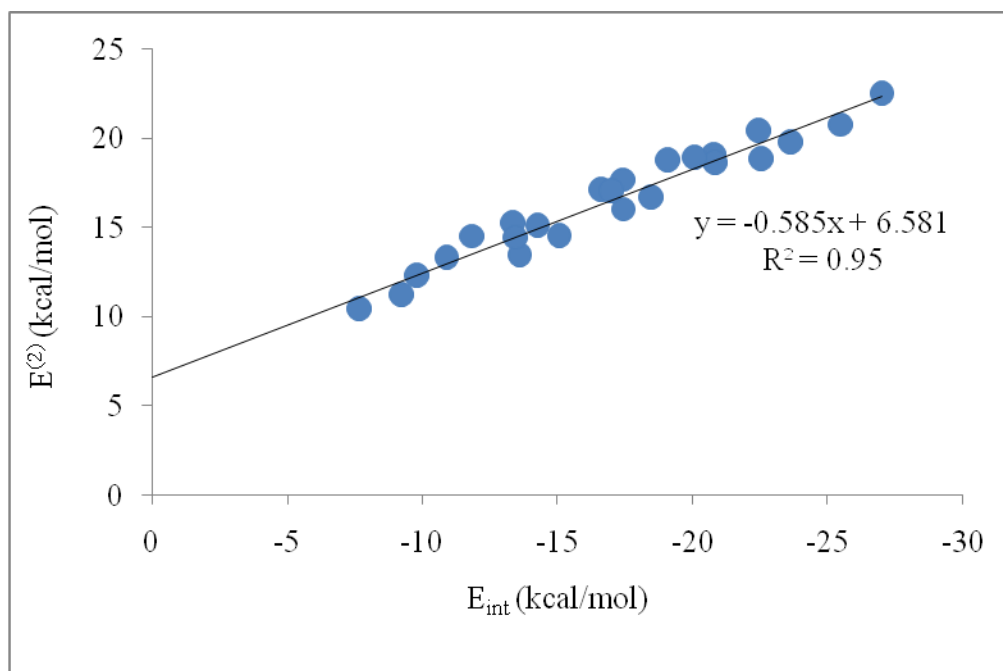

**Figure S4.** Correlation between the net charge-transfer and interaction energies of cationic tetrel-bonded complexes **7-30**

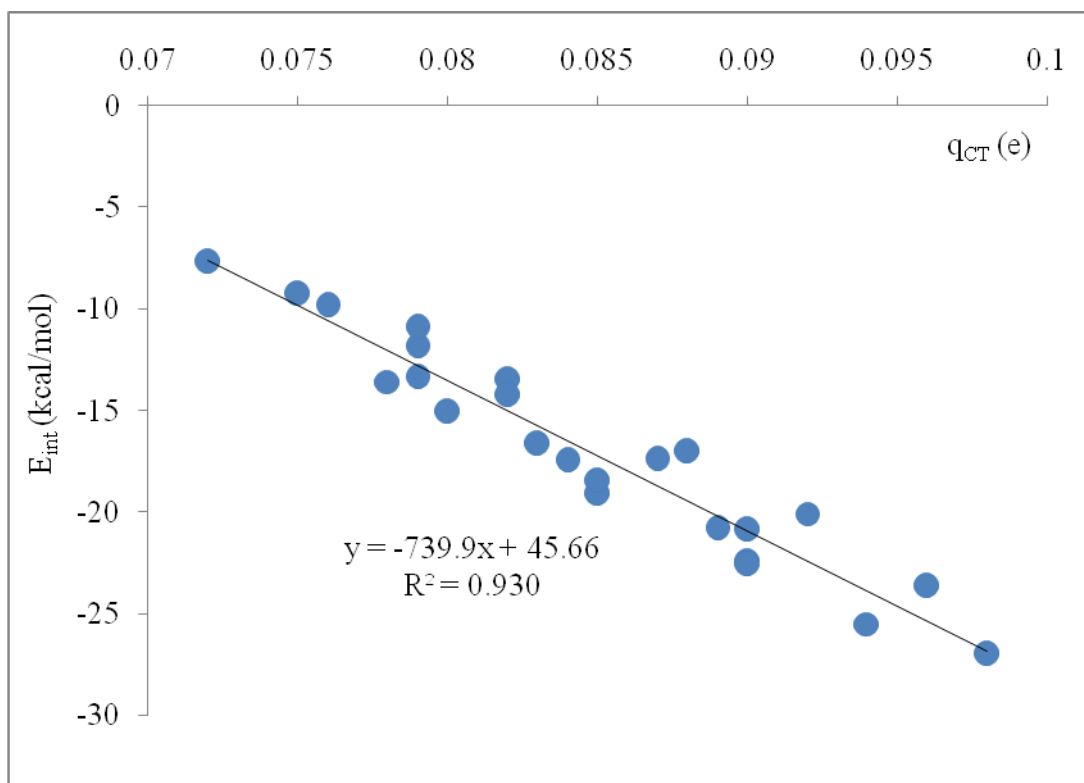

Supplement: s1 [file s1]
